# Supplementary material for: Dual active sites of single-atom copper and oxygen vacancies formed in situ on ultrathin TiO2(B) nanosheets boost the photocatalytic dehalogenative C–C coupling synthesis of bibenzyl
Source: Royal Society of Chemistry journal article supplement (doi:10.1039/d3cy01611k), 2024-01-01
Supplement: d3cy01611k1.pdf [file d3cy01611k1.pdf]

## Supplementary Information

### **Dual active sites of single-atom copper and oxygen vacancy formed in-situ on ultrathin TiO<sub>2</sub>(B) nanosheet boost the photocatalytic dehalogenative C–C coupling synthesis of bibenzyl**

Qifeng Chen<sup>#a\*</sup>, Peng Zheng<sup>#a</sup>, Haodi Liu<sup>a</sup>, Yuanrong Zhang<sup>a</sup>, Shuaitao Li<sup>a</sup>, Hongpian Guo<sup>a</sup>, Yanfen Fang<sup>b\*</sup>, Xun Hu<sup>a\*</sup>, Ran Duan<sup>c</sup>

<sup>a</sup> Dr. & Prof. Qifeng Chen, MS Peng Zheng, MS Yuanrong Zhang, MS Shuaitao Li, Miss Hongpian Guo, Dr. & Prof. Xun Hu, School of Materials Science & Engineering, University of Jinan, No. 336, West Road of Nan Xinzhuang, Jinan 250022, Shandong, China, [qfchen@126.com](mailto:qfchen@126.com) (Qifeng Chen); [mse\\_hux@ujn.edu.cn](mailto:mse_hux@ujn.edu.cn) (Xun Hu).

<sup>b</sup> Prof. Yanfen Fang, College of Biological and Pharmaceutical Sciences, China Three Gorges University, Yichang, China, 443002, [fangyf@ctgu.edu.cn](mailto:fangyf@ctgu.edu.cn).

<sup>c</sup> Ms Ran Duan, Institute of Chemistry, Chinese Academy of Sciences, Zhongguancun North First Street 2, Beijing, 100190, China.

**Photoelectrochemical measurement.** In the photocurrent measurement process, we used an Ag/AgCl electrode (3.0 M KCl) as the reference electrode and a platinum electrode as the counter electrode. The working electrode was prepared by impregnating the sample on FTO glass. The measurement of the three-electrode system was carried out in Na<sub>2</sub>SO<sub>4</sub> (0.2 M) electrolyte. For the electrochemical impedance test, the three-electrode system was measured in a mixture of 0.1 M potassium ferricyanide and 0.1 M potassium ferrocyanide electrolyte. The measurement frequency of Nyquist plot was  $1 \times 10^6 \sim 0.01$  Hz.

The working electrode was prepared as follows: 3.0 mg of photocatalysts were added into a mixture of 0.3 mL ethanol and 0.1 mL Nafion (0.1 wt%, Alfar Aesar). A homogeneous suspension was obtained by using ultrasonic oscillation for 10 min. Then, the photocatalyst suspension was dropped onto the FTO glass under an infrared lamp. After solvent volatilization, the working electrode with an active area (covered by photocatalysts) of 1.0 cm<sup>2</sup> was obtained.

**Preparation of AFM sample.** A specific amount of TiO<sub>2</sub>(B) was dispersed in ethanol solution under ultrasonic treatment. Drops of the dispersed liquid were then added drop by drop to the mica sheet. After drying, the sample was photographed with a Bruker Dimension Icon AFM instrument.

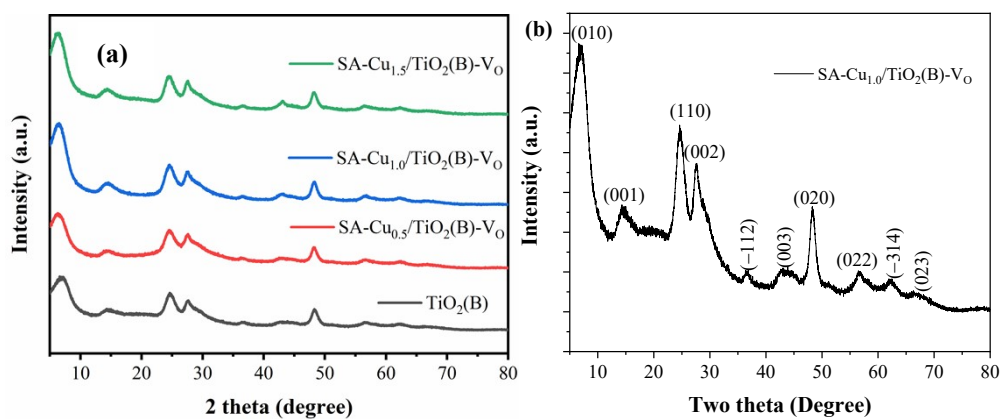

**Fig. S1** XRD patterns of SA-Cu<sub>x</sub>/TiO<sub>2</sub>(B)-V<sub>O</sub> photocatalysts (a), and enlarged XRD pattern of SA-Cu<sub>1.0</sub>/TiO<sub>2</sub>(B)-V<sub>O</sub>.

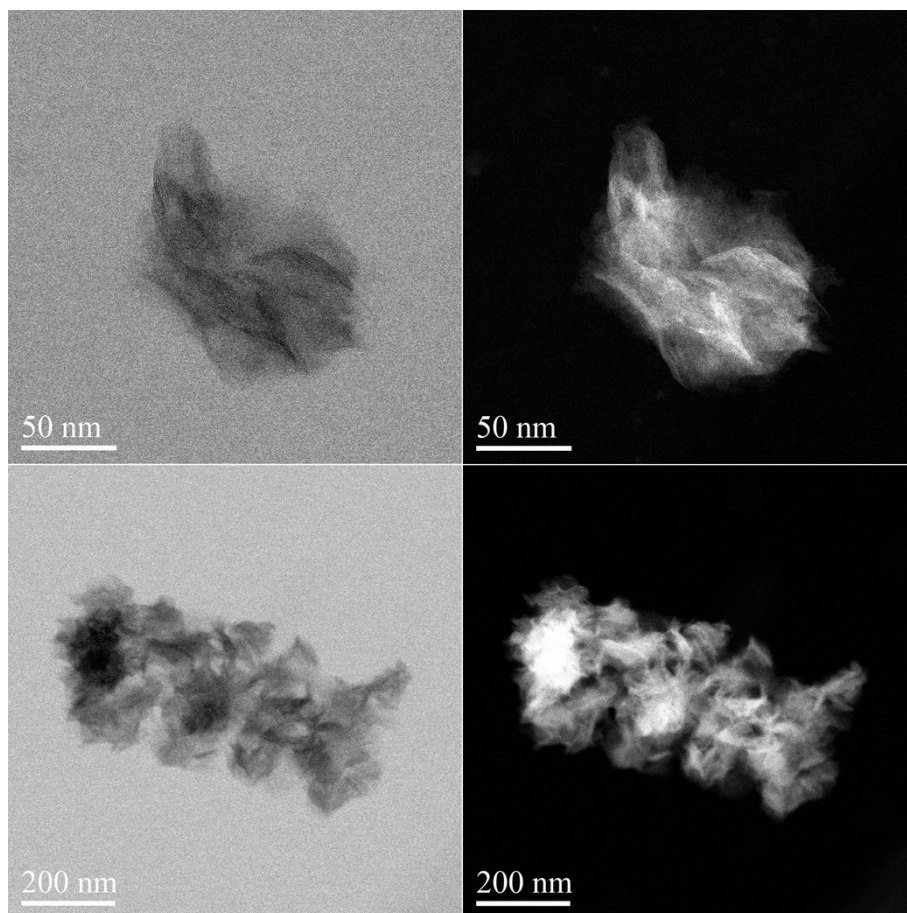

**Fig. S2** HAADF-STEM images of SA-Cu<sub>1.0</sub>/TiO<sub>2</sub>(B)-V<sub>O</sub>.

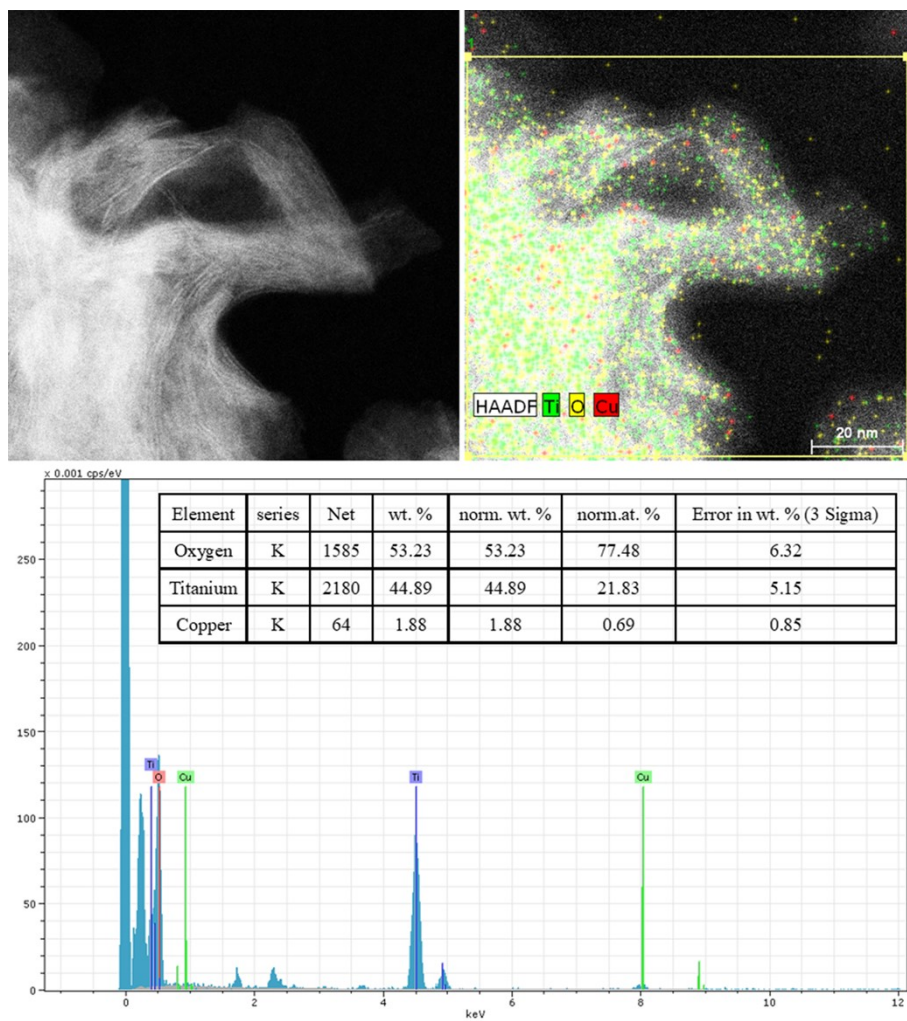

**Fig. S3** EDS spectrum and analysis of SA-Cu<sub>1.0</sub>/TiO<sub>2</sub>(B)-V<sub>O</sub>.

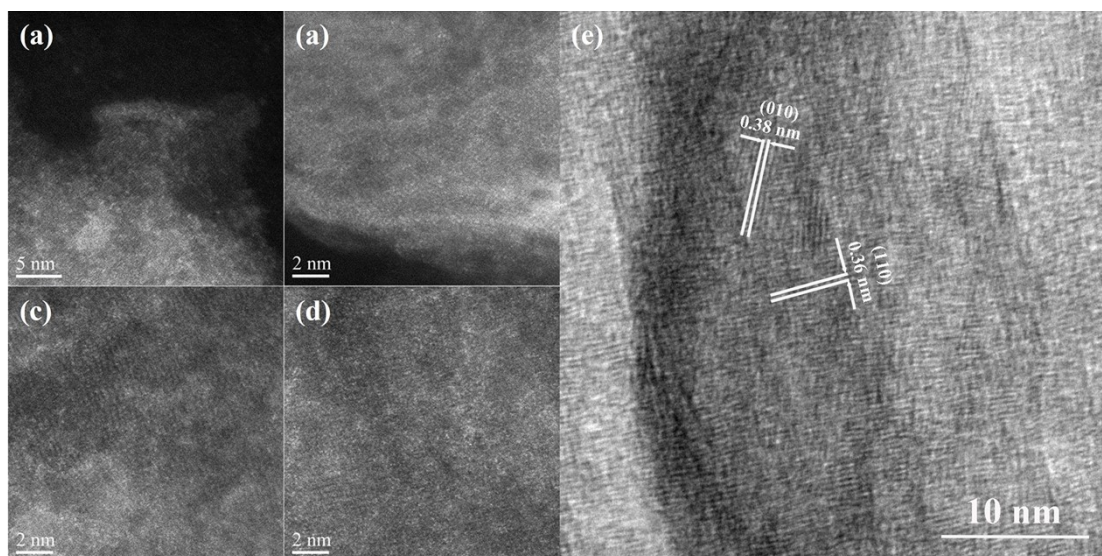

**Fig. S4** AC-HAADF-STEM images of SA-Cu/TiO<sub>2</sub>(B)-V<sub>O</sub> (a-d) and HRTEM image of TiO<sub>2</sub>(B) (e).

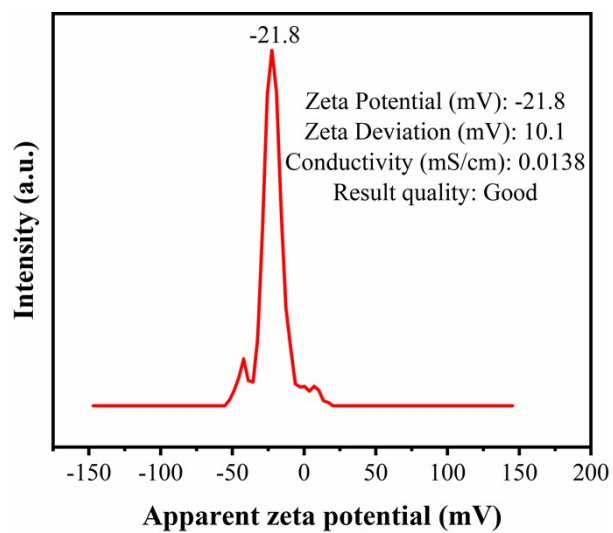

**Fig. S5** The result of the Zeta potential test of TiO<sub>2</sub>(B). 1.0 mg of the samples were dispersed in 5.0 mL H<sub>2</sub>O, and then performed the test.

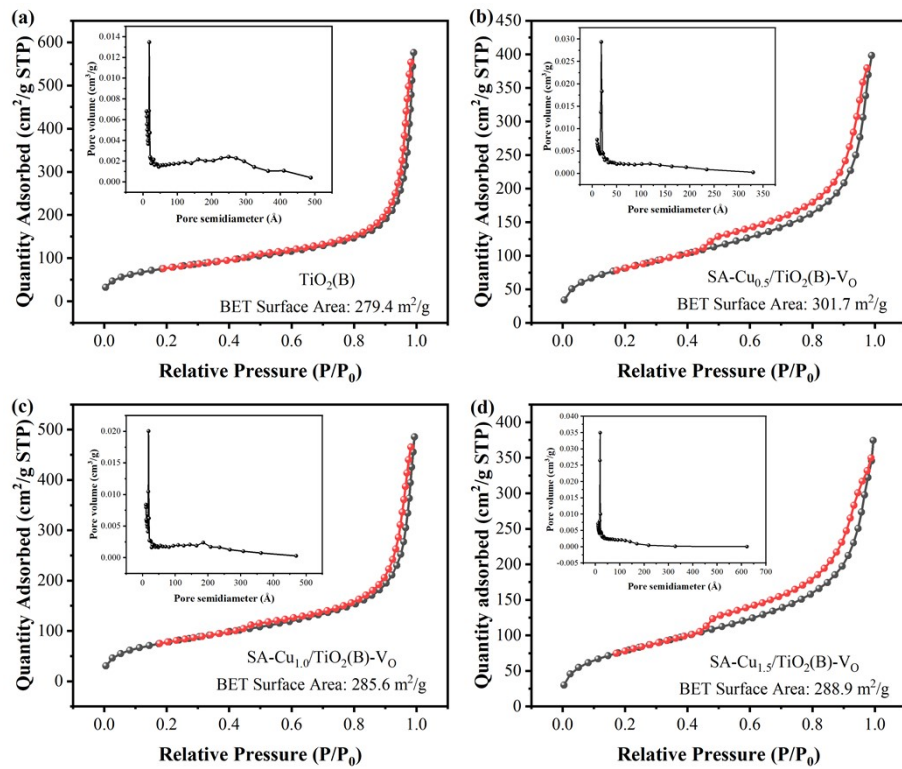

**Fig. S6** Nitrogen adsorption/desorption isotherm and pore size distribution of various photocatalysts



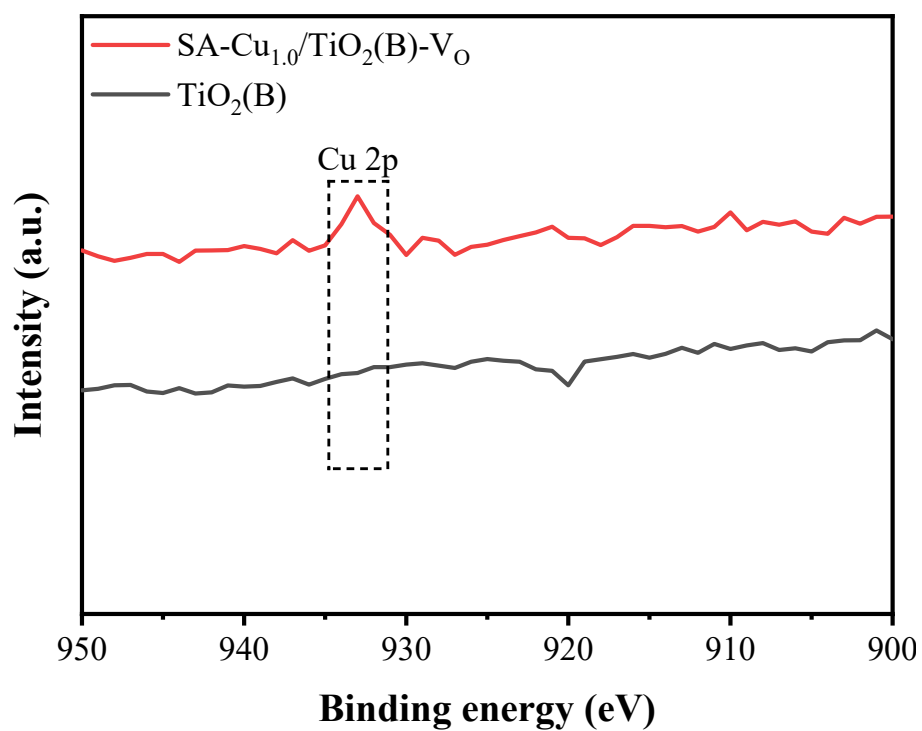

Fig. S7 Partially enlarged XPS survey spectra of  $\text{TiO}_2(\text{B})$  and  $\text{SA-Cu}_{1.0}/\text{TiO}_2(\text{B})\text{-VO}$ .

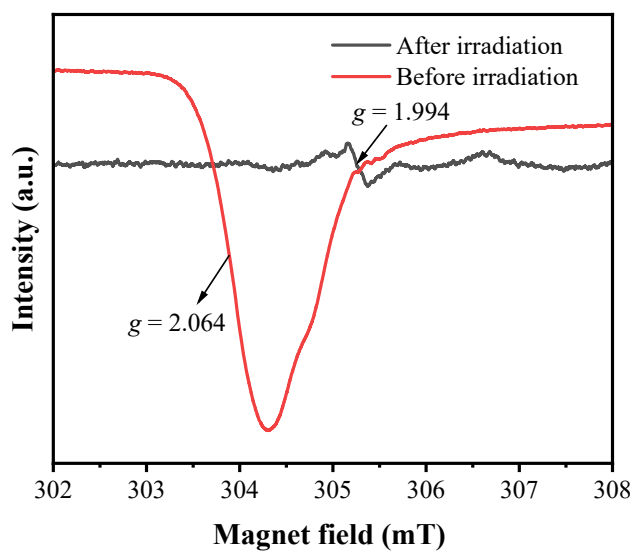

Fig. S8 EPR spectra of  $\text{SA-Cu}/\text{TiO}_2(\text{B})\text{-VO}$  adsorbed with Cu ions before and after photoreduction.

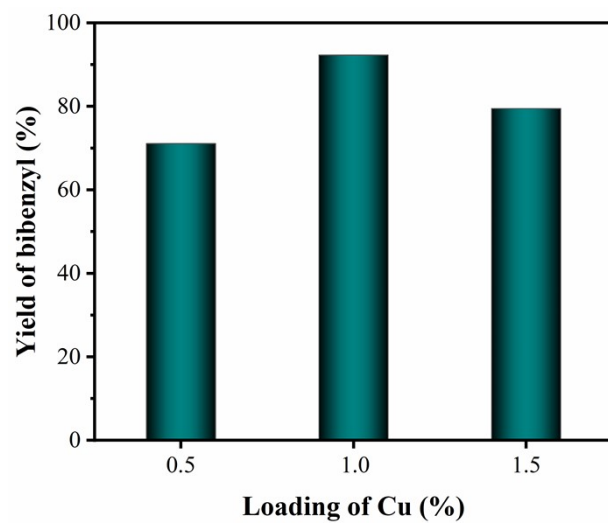

**Fig. S9** The effect of Cu loading on photocatalytic synthesis of bibenzyl under irradiation

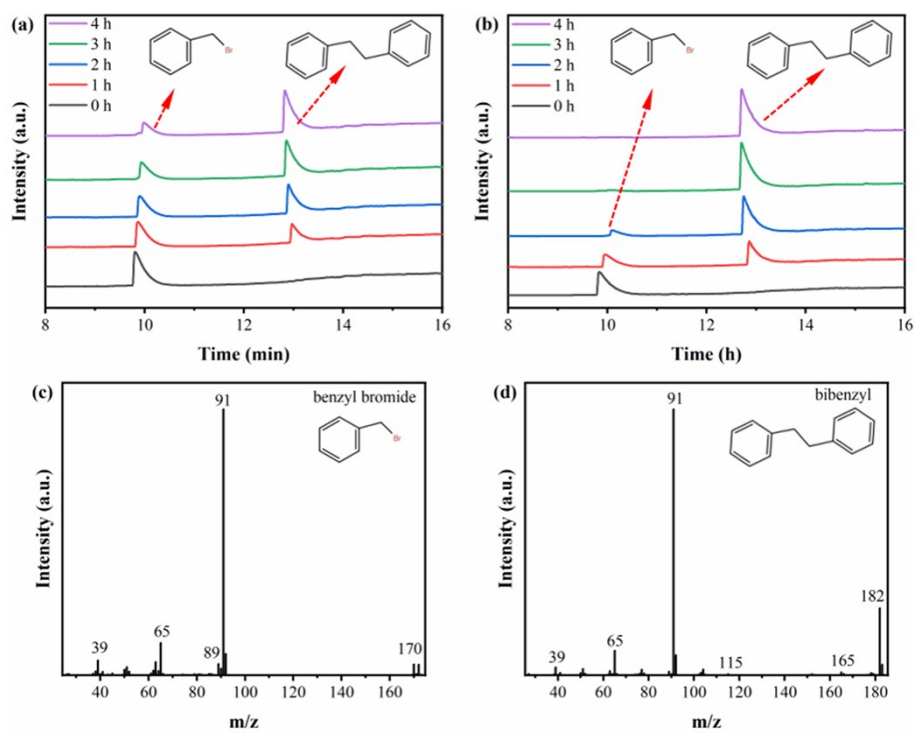

**Fig. S10** (a-b) GC spectra at different reaction times in pure and aqueous isopropanol in the presence of SA-Cu<sub>1.0</sub>/TiO<sub>2</sub>(B)-V<sub>O</sub>; (c) mass spectrum of the reactant, benzyl bromide; (d) mass spectrum of the product, bibenzyl

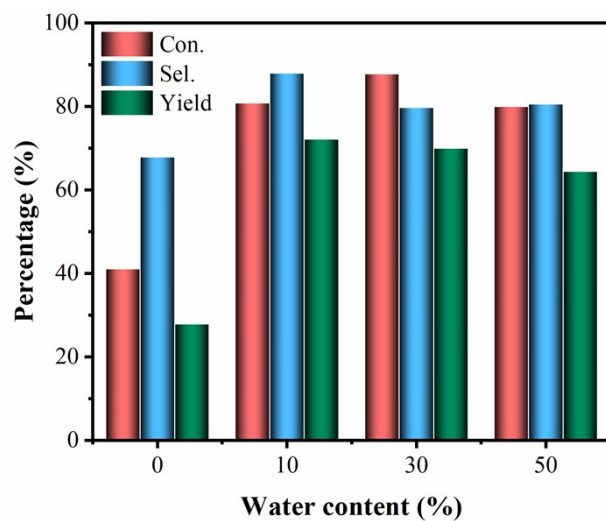

**Fig. S11** The effect of water concentration on photocatalytic coupling synthesis of bibenzyl after irradiation of 2 h.

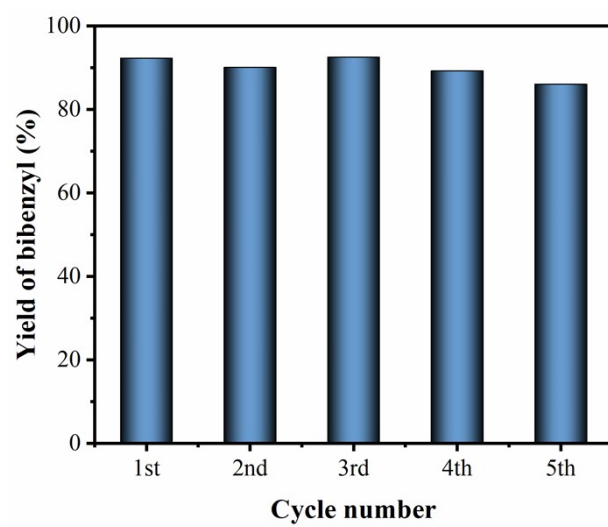

**Fig. S12** The photocatalytic cycle tests for SA-Cu<sub>1.0</sub>/TiO<sub>2</sub>(B)-V<sub>O</sub>.

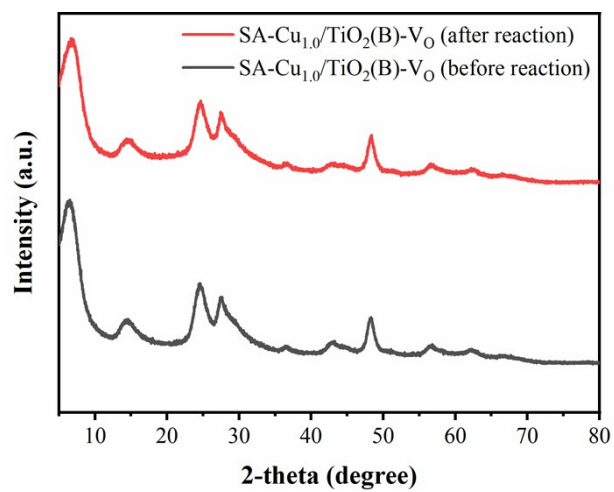

**Fig. S13** XRD pattern of SA-Cu<sub>1.0</sub>/TiO<sub>2</sub>(B)-V<sub>O</sub> before and after the photocatalytic reaction.

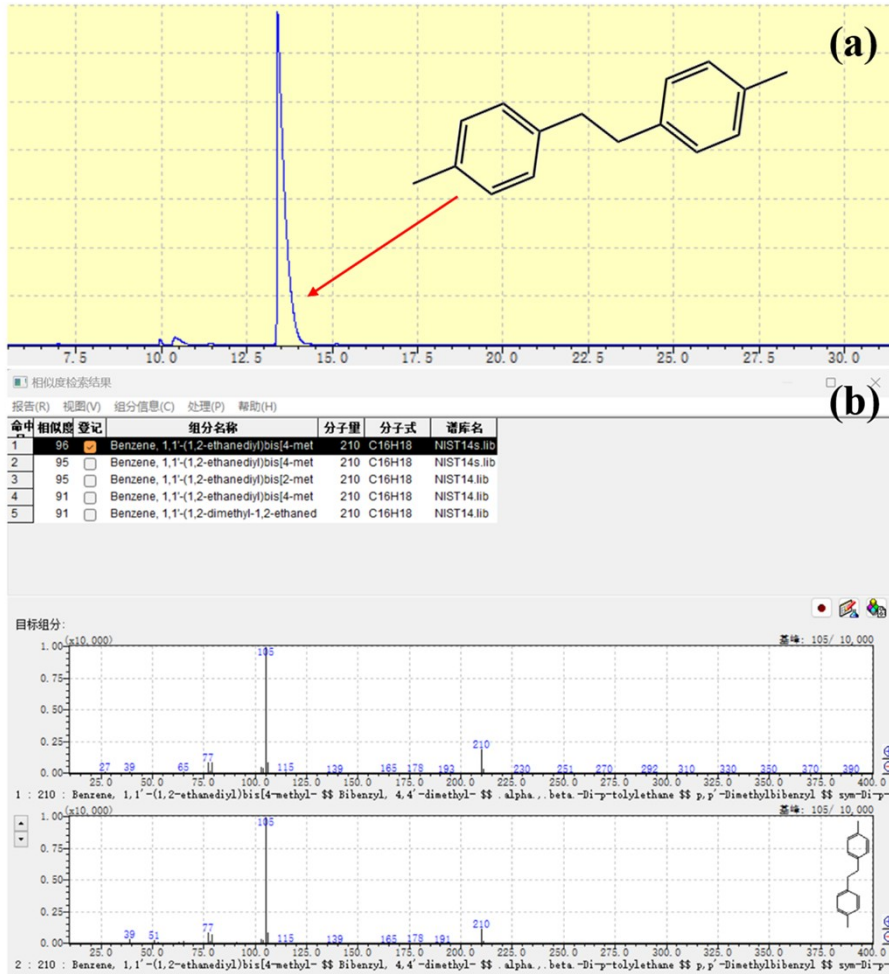

Fig. S14 4-methylbenzene bromide as substrate, (a) GC data. (b) MS data.

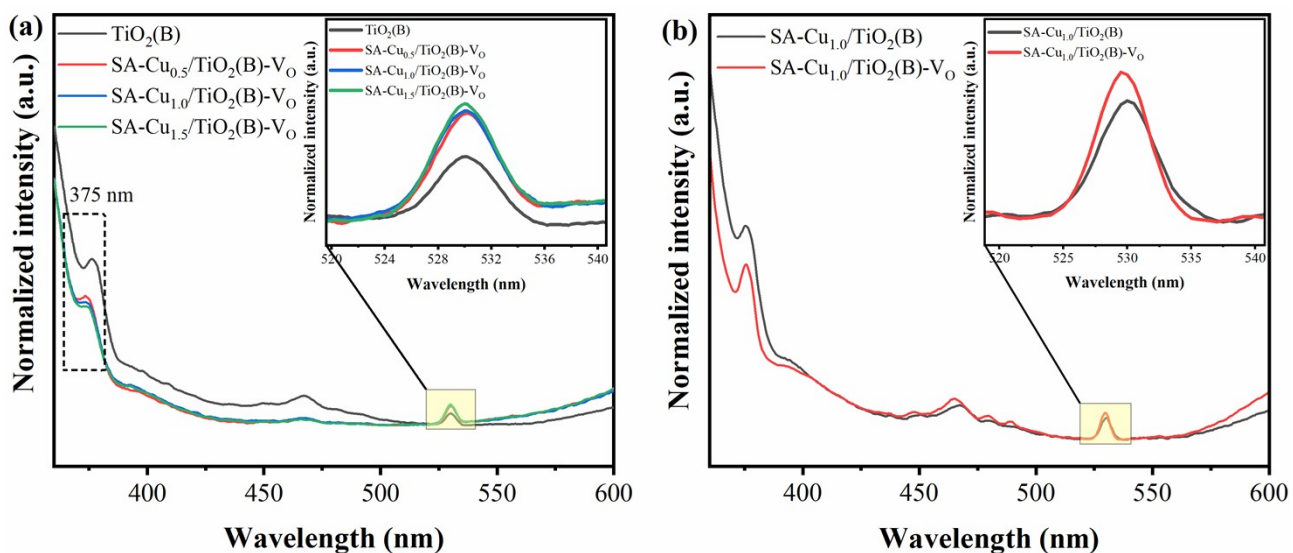

**Fig. S15** (a) PL spectra of SA-Cu<sub>x</sub>/TiO<sub>2</sub>(B)-V<sub>O</sub> photocatalysts. (b) PL spectra of SA-Cu<sub>1.0</sub>/TiO<sub>2</sub>(B)-V<sub>O</sub> photocatalyst before and after air annealing.



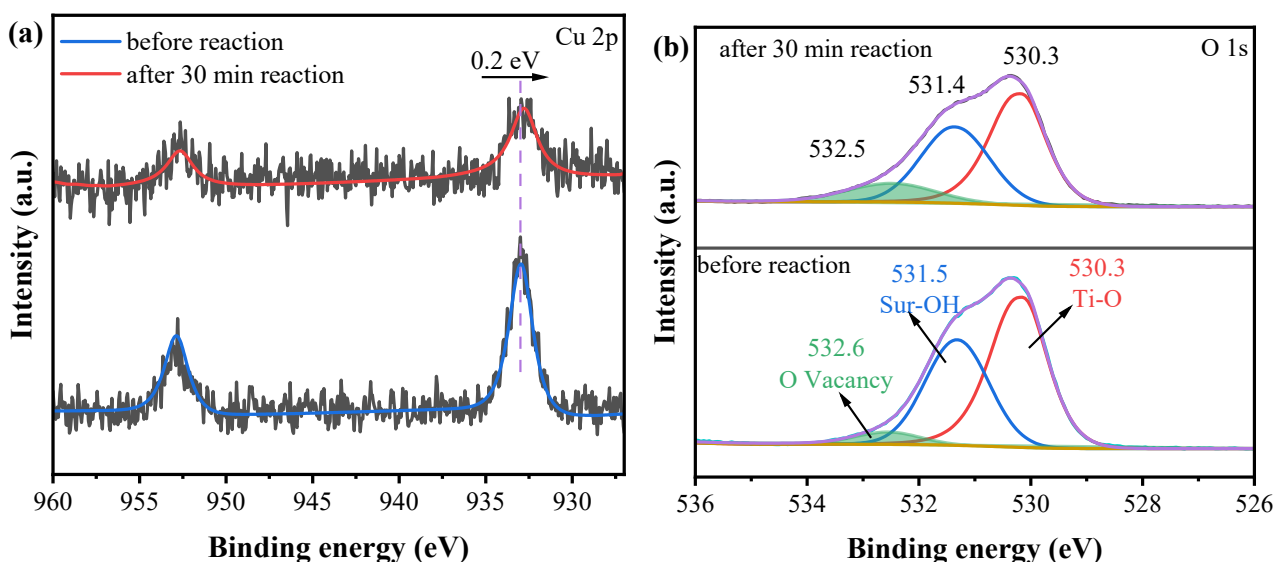

**Fig. S16** XPS spectra of  $\text{TiO}_2(\text{B})$  and  $\text{SA-Cu}_{1.0}/\text{TiO}_2(\text{B})-\text{V}_\text{O}$  photocatalyst before and after irradiation of 30 mins, Cu 2p (a) and O 1s (b).

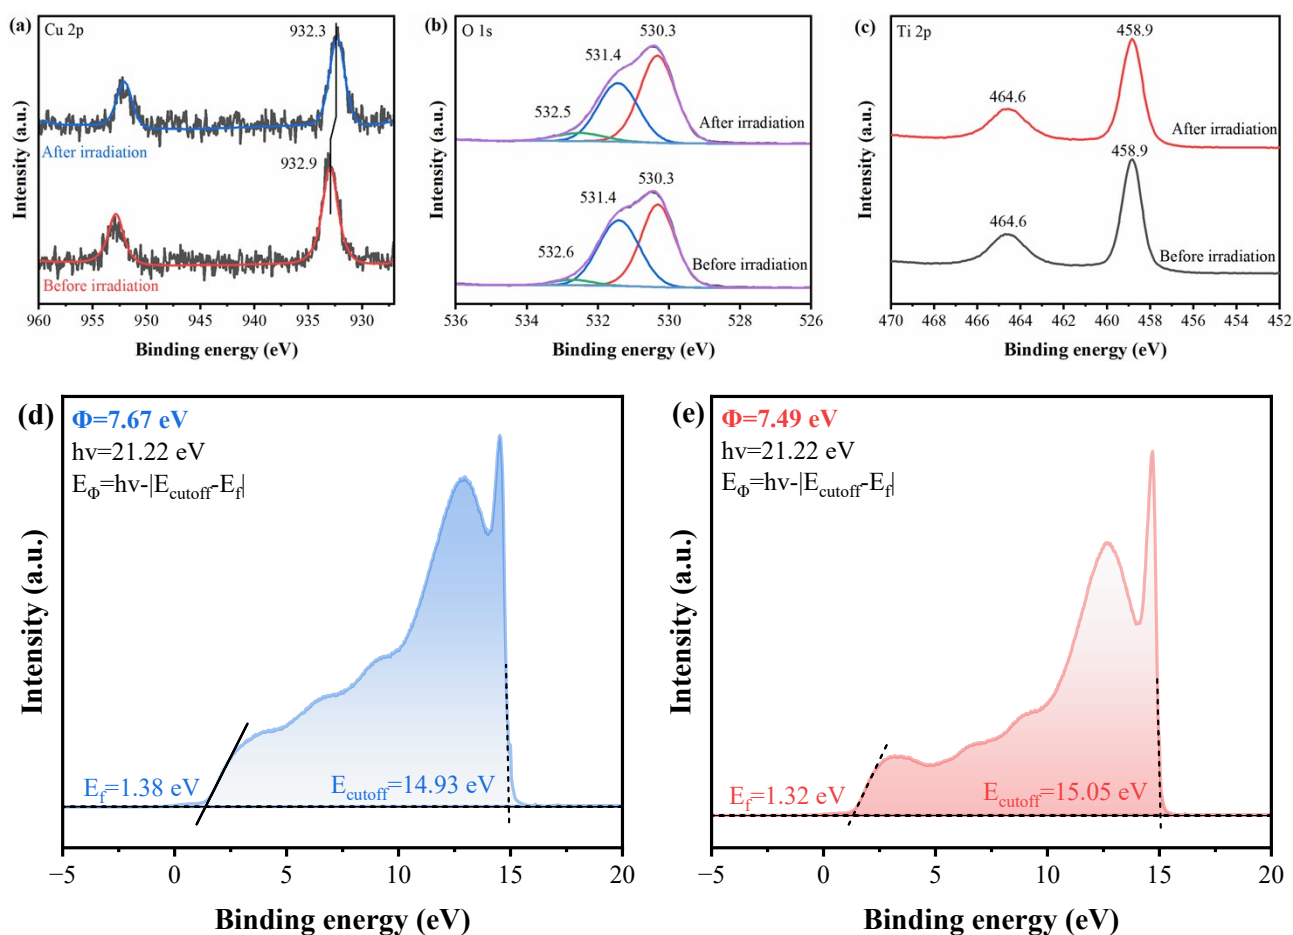

**Fig. S17** XPS spectra of  $\text{SA-Cu}_{1.0}/\text{TiO}_2(\text{B})-\text{V}_\text{O}$  photocatalyst before and after irradiation (a-c), and UPS spectra of  $\text{TiO}_2(\text{B})$  and  $\text{SA-Cu}_{1.0}/\text{TiO}_2(\text{B})-\text{V}_\text{O}$  (d-e).

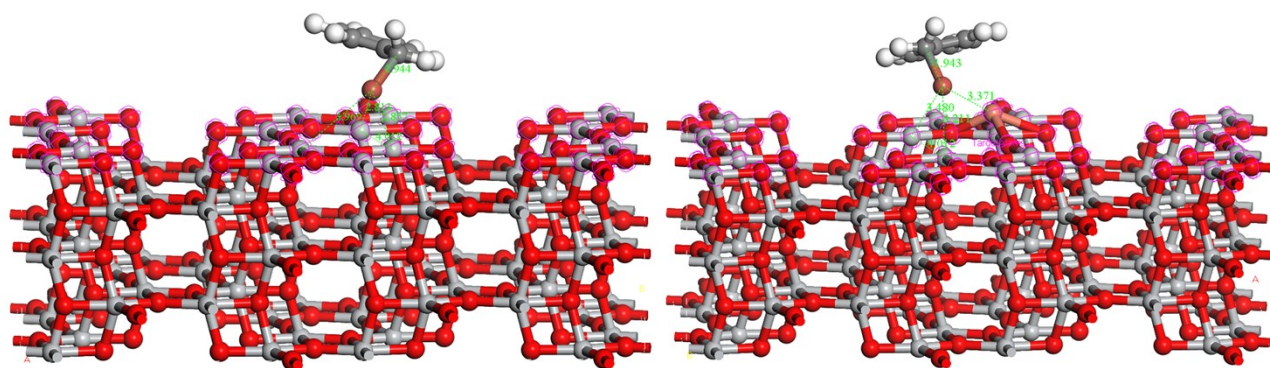

**Fig. S18** Changes of C–Br bond length of benzyl bromide before and after introduction of single atom Cu.

**Table S1** ICP-OES content analysis of Cu on the surface of SA-Cu<sub>x</sub>/TiO<sub>2</sub>(B)-V<sub>O</sub>.

| Sample                                                    | The theoretical loading | The actual loading |
|-----------------------------------------------------------|-------------------------|--------------------|
| SA-Cu <sub>0.5</sub> /TiO <sub>2</sub> (B)-V <sub>O</sub> | 0.50%                   | 0.43%              |
| SA-Cu <sub>1.0</sub> /TiO <sub>2</sub> (B)-V <sub>O</sub> | 1.00%                   | 0.83%              |
| SA-Cu <sub>1.5</sub> /TiO <sub>2</sub> (B)-V <sub>O</sub> | 1.50%                   | 1.14%              |

**Table S2** Pore radius volume, and specific surface area of SA-Cu<sub>x</sub>/TiO<sub>2</sub>(B)-V<sub>O</sub> photocatalysts.

| Entry | Photocatalysts                                            | Pore Volume<br>(cm <sup>3</sup> /g) | Pore semidiameter<br>(Å) | BET surface<br>area (m <sup>2</sup> /g) |
|-------|-----------------------------------------------------------|-------------------------------------|--------------------------|-----------------------------------------|
| 1     | TiO <sub>2</sub> (B)                                      | 0.89                                | 64.2                     | 279.4                                   |
| 2     | SA-Cu <sub>0.5</sub> /TiO <sub>2</sub> (B)-V <sub>O</sub> | 0.62                                | 41.1                     | 301.7                                   |
| 3     | SA-Cu <sub>1.0</sub> /TiO <sub>2</sub> (B)-V <sub>O</sub> | 0.75                                | 52.9                     | 285.6                                   |
| 4     | SA-Cu <sub>1.5</sub> /TiO <sub>2</sub> (B)-V <sub>O</sub> | 0.58                                | 40.3                     | 288.9                                   |

**Table S3** Atom percentages of O 1s peaks determined by the XPS analysis.

| Sample         | TiO <sub>2</sub> (B) | SA-Cu <sub>1.0</sub> /TiO <sub>2</sub> (B)-V <sub>O</sub> |
|----------------|----------------------|-----------------------------------------------------------|
| O <sub>1</sub> | 530.3 (47.75%)       | 530.4 (50.33%)                                            |
| O <sub>2</sub> | 531.4 (48.14%)       | 531.5 (38.39%)                                            |
| O <sub>3</sub> | 532.9 (4.11%)        | 532.6 (11.28%)                                            |

**Table S4** Adsorption capacity of different photocatalysts for substrate molecules.

| Sample                                                | Substrate added (g) | Solution weight (g) | Substrate content before adsorption | Substrate content after adsorption | Adsorption coefficient |
|-------------------------------------------------------|---------------------|---------------------|-------------------------------------|------------------------------------|------------------------|
| Cu <sup>2+</sup> /TiO <sub>2</sub> (B)-V <sub>O</sub> | 0.02565             | 10.3023             | 0.002490                            | 0.002477                           | 0.005049               |
| TiO <sub>2</sub> (B)-V <sub>O</sub>                   | 0.0266              | 10.2199             | 0.002603                            | 0.002600                           | 0.000816               |
| Cu/TiO <sub>2</sub> (B)-V <sub>O</sub>                | 0.0248              | 10.1862             | 0.002435                            | 0.002385                           | 0.020219               |
| Cu <sup>2+</sup>                                      | 0.0269              | 10.2357             | 0.002628                            | 0.002618                           | 0.003986               |

**Table S5** Photocatalytic conversion of benzyl bromide in different solvents.

| Entry | Solvent                               | Conversion (%) | Selectivity (%) | Yield (%) |
|-------|---------------------------------------|----------------|-----------------|-----------|
| 1     | Isopropanol                           | 67.38          | 64              | 43.12     |
| 2     | Ethanol                               | 99.33          | 68.59           | 68.13     |
| 3     | Methanol                              | 100            | 91.59           | 91.59     |
| 4     | Isopropanol solution (10 vol% water)  | 100            | 92.32           | 92.32     |
| 5     | Ethanol solution (10 vol% water)      | 100            | 96.78           | 96.78     |
| 6     | Methanol solution (10 vol% water)     | 100            | 97.20           | 97.20     |
| 7     | Acetonitrile solution (30 vol% water) | 57.65          | 74.83           | 43.14     |

**Table S6** Adsorption energy of benzyl bromide and bibenzyl at different adsorption sites.

|                                                  | E(A-B)/(kcal/mol) | EA (kcal/mol) | EB (kcal/mol) | Eint (kcal/mol) |
|--------------------------------------------------|-------------------|---------------|---------------|-----------------|
| PhBr@TiO <sub>2</sub> (B)(010)                   | -193226.1222      | -193209.4167  | 5.599547      | -22.305034      |
| PhBr@TiO <sub>2</sub> (B)(010)V <sub>o</sub>     | -192366.4991      | -192348.6626  | 5.600752      | -23.437319      |
| PhBr@TiO <sub>2</sub> (B)(010)V <sub>o</sub> +Cu | -67638.52796      | -67601.91634  | 4.905675      | -41.517295      |
| BiPh@TiO <sub>2</sub> (B)(010)V <sub>o</sub> +Cu | -67651.62836      | -67651.62836  | 1.086108      | -1.086108       |
| PhBr+BiPh@TiO <sub>2</sub> (B)(010)+C            | -68499.3117       | -68499.3117   | 5.565367      | -5.565367       |

u
